# Supplementary material
Source: PubMed Central journal article supplement (PMC3579448)

## SUPPLEMENTARY DATA

TABLE S1. Survey of populations of *Allium oleraceum* measured for genome size variation

| Population number | Locality (country, settlement, description)                                                                                                                 | Geographic coordinates (latitude, longitude) | Altitude (m a.s.l.) | DNA-Ploidy level (2n) | Chromosome number (2n) | Mean 2C value $\pm$ s.d. (DNA pg) | 2C value range (min-max) (DNA pg) | CV range (%) | No. plants measured |
|-------------------|-------------------------------------------------------------------------------------------------------------------------------------------------------------|----------------------------------------------|---------------------|-----------------------|------------------------|-----------------------------------|-----------------------------------|--------------|---------------------|
| 1                 | Ukraine, Semenkovje: 1,4 km WNW of the village, dry grassland on left side of the Južnyj Bug river                                                          | 48.1728 N<br>30.4339 E                       | 90                  | 3x                    | 24                     | 40.60 $\pm$ 0.09                  | 40.52-40.71                       | 3.08-4.24    | 3                   |
| 2                 | Hungary, Alcsútdoboz: 4 km SW of the village, oak-hornbeam forest margin invaded by <i>Robinia pseudacacia</i>                                              | 47.4000 N<br>18.5666 E                       | 150                 | 3x                    |                        | 42.58 $\pm$ 0.34                  | 42.02-42.88                       | 3.78-4.82    | 5                   |
| 3                 | Hungary, Szúcs: mesic scrub under the steppe above the road                                                                                                 | 48.0505 N<br>20.2341 E                       | 312                 | 3x                    |                        | 42.70 $\pm$ 0.50                  | 42.13-42.99                       | 3.19-4.20    | 3                   |
| 4                 | Hungary, Kurd: 1 km SE of the village, margin of the oak-hornbeam forest and oak-hornbeam forest invaded by <i>Robinia pseudacacia</i>                      | 46.4300 N<br>18.3233 E                       | 165                 | 3x                    |                        | 42.80 $\pm$ 0.39                  | 42.37-43.13                       | 3.08-4.79    | 3                   |
| 5                 | Hungary, Király-kút: Pilishegység Mts (Pilis Biosphere reserve): Király-kút, ca. 11 km SSW of the town of Visegrád. Oak forest with <i>Quercus cerris</i> . | 47.6916 N<br>18.9211 E                       | 468                 | 3x                    |                        | 42.85 $\pm$ 0.07                  | 42.80-42.90                       | 3.58-3.82    | 2                   |
| 6                 | Romania, Tálmaciu: broad-leaved dry grassland and mesic scrub under the castle                                                                              | 45.6527 N<br>24.2707 E                       | 516                 | 3x                    | 24                     | 43.45 $\pm$ 0.09                  | 43.36-43.55                       | 3.77-4.96    | 3                   |
| 7                 | Slovakia, Luboreč: South slope of the Velký Lysec hill.                                                                                                     | 48.3491 N<br>19.4631 E                       | 654                 | 3x                    | 24                     | 43.33 $\pm$ 0.09                  | 43.15-44.23                       | 3.40-4.07    | 2                   |
| 8                 | Ukraine, Oster: 1 km N of the Oster city, margin of the road, in the dune with pine forest                                                                  | 50.9560 N<br>30.8803 E                       | 107                 | 3x                    | 24                     | 42.11 $\pm$ 0.10                  | 42.07-42.11                       | 4.20-5.17    | 2                   |
| 9                 | Spain, Estane Long: National Park Sant Maurici, tourist path W of the Estany de Llebre lake, close to the cascades                                          | 42.5514 N<br>0.89787 E                       | 1701                | 4x                    |                        | 48.02 $\pm$ 0.06                  | 47.96-48.08                       | 4.02-4.58    | 3                   |
| 10                | Austria, Gmunden - Traumstein: 200 m E of the road around the lake, by the tourist marked path in the beech forest                                          | 47.8763 N<br>13.8155 E                       | 481                 | 4x                    |                        | 48.45 $\pm$ 0.49                  | 47.89-48.78                       | 3.91-4.45    | 3                   |
| 11                | Switzerland, Sennwald: along the road number 13 to Sennwald, oak-hornbeam forest and rock outcrop at the edge of the                                        | 47.8391 N<br>0.28388 E                       | 101                 | 4x                    | 32                     | 49.13 $\pm$ 0.22                  | 48.95-49.38                       | 3.75-4.60    | 3                   |

forest

|    |                                                                                                                                                        |                        |      |    |            |             |           |   |
|----|--------------------------------------------------------------------------------------------------------------------------------------------------------|------------------------|------|----|------------|-------------|-----------|---|
| 12 | France, Villar d'Arene: alpine grassland along the road to mountain pass                                                                               | 45.0328 N<br>6.38405 E | 1981 | 4x | 49.13±0.28 | 48.81-49.35 | 4.31-4.99 | 3 |
| 13 | France, La Palud Sur Verdon: grassland between the lucerne field                                                                                       | 43.7819 N<br>6.34444 E | 918  | 4x | 49.91±0.69 | 49.18-50.92 | 3.13-4.69 | 5 |
| 14 | Romania, Abucea: 1 km E of the village, et the edge of the oak-hornbeam forest along the road                                                          | 45.9133 N<br>22.5471 E | 203  | 4x | 51.19±0.11 | 51.06-51.26 | 3.66-4.90 | 3 |
| 15 | Austria, Gunselsdorf: S margin of the village, alluvial forest along the park                                                                          | 47.9402 N<br>16.2570 E | 249  | 4x | 51.51±0.07 | 51.46-51.59 | 3.50-4.68 | 3 |
| 16 | Romania, Lugoj: 6.8 km of the Lugoj village, oak-hornbeam forest along the road number 68A                                                             | 45.7459 N<br>21.9947 E | 251  | 4x | 52.08±0.12 | 51.96-52.20 | 3.55-4.66 | 3 |
| 17 | Czech Rep., Syrovín: 1 km N of the village, mesic Arrhenatherum meadow invaded by mesic scrub, on the slope invaded by Robinia pseudacacia             | 49.0294 N<br>17.2683 E | 292  | 4x | 52.17±0.04 | 52.14-52.20 | 3.93-4.77 | 2 |
| 18 | Czech Rep., Ústějov: on the NW village margin, mesic scrub along acidophilous oak-hornbeam forest and mesic Arrhenatherum meadow                       | 49.5167 N<br>14.8200 E | 514  | 4x | 52.60±0.13 | 52.51-52.69 | 4.11-4.95 | 2 |
| 19 | Germany, Lödderitz: 0.5 km NW of the village, wet oak-hornbeam forest                                                                                  | 51.8900 N<br>11.9463 E | 55   | 4x | 53.43±0.13 | 53.34-53.52 | 4.26-4.85 | 2 |
| 20 | Switzerland, La Punt-Chamues-ch: rocky slope under the pasture, between the road and river                                                             | 46.5844 N<br>9.93277 E | 1688 | 4x | 53.86±0.12 | 53.73-54.04 | 3.06-4.77 | 5 |
| 21 | Czech Rep., Veltruby: Nature reservation Veltrubský luh, wet oak-hornbeam forest                                                                       | 50.0675 N<br>15.1700 E | 183  | 4x | 53.96±0.44 | 53.60-54.45 | 3.04-4.18 | 3 |
| 22 | Slovakia, Žembovice: Šťavnické vrchy mountain, 1 km S of the Tlstý Vrch settlement, oak-hornbeam forest along the road and rocks bushed by mesic scrub | 48.2794 N<br>18.7966 E | 370  | 4x | 54.29±0.45 | 53.67-54.62 | 3.59-4.72 | 4 |
| 23 | Hungary, Hernadszurdok: 1.5 km S of the village, balk between the orchards invaded by Robinia pseudacacia                                              | 48.4666 N<br>21.2000 E | 147  | 4x | 54.31±0.04 | 54.27-54.35 | 3.57-4.70 | 3 |
| 24 | Slovakia, Jablonné: 1.5 km S of the village, Sul'ovské skály mountain, pine-wood forest and field margin bushed by Prunus spinosa                      | 49.1768 N<br>18.5746 E | 366  | 4x | 54.98±0.29 | 54.78-55.19 | 3.57-4.83 | 2 |

|    |                                                                                                                                                                                        |                        |      |    |    |            |             |           |   |
|----|----------------------------------------------------------------------------------------------------------------------------------------------------------------------------------------|------------------------|------|----|----|------------|-------------|-----------|---|
| 25 | Poland, Wroclaw: 1.5 km S of the town margin, mixed broad-leaved forest along the road                                                                                                 | 51.0658 N<br>17.0516 E | 120  | 4x | 32 | 55.55±0.26 | 55.36-55.85 | 3.85-4.82 | 3 |
| 26 | Czech Rep., Slatinice: 1 km W of the church in the village, secondary Robinia pseudacacia forest in the valley of the brook                                                            | 49.5606 N<br>17.0886 E | 270  | 4x |    | 55.93±0.31 | 55.57-56.15 | 3.80-4.84 | 3 |
| 27 | France, Roqueredonde: 1.2 km E of the village center, dry grassland pastures with Bromus erectus and Phleum phleoides along the road D902                                              | 43.7999 N<br>3.22725 E | 757  | 4x |    | 48.81±0.79 | 48.13-49.68 | 4.17-4.56 | 3 |
| 28 | Lithuania, Raseiniai reg. Vaškučiai: Hill, southern incline 40°, Trifolium medii, numerous population.                                                                                 | 55.3519 N<br>23.3694 E | 106  | 4x | 32 | 55.79±1.55 | 53.74-57.00 | 3.96-4.90 | 5 |
| 29 | Slovenia, Dovje: 1 km S of the village, road side                                                                                                                                      | 46.4666 N<br>13.9347 E | 659  | 4x |    | 52.35±0.26 | 52.16-52.53 | 4.74-4.75 | 2 |
| 30 | Slovakia, Kvetnica: Hranovnická dubina reservation close to the round to Dubina village, 200 m E of the quarry, thermophilic oak-hornbeam forest, rocks along the margin of the forest | 49.0083 N<br>20.2894 E | 790  | 4x |    | 53.49±0.63 | 53.04-53.94 | 3.52-4.99 | 2 |
| 31 | Norway, Norddal: bank of the brook flow into the Gajrangersky fiord                                                                                                                    | 61.6311 N<br>5.38444 E | 166  | 4x |    | 53.08±0.17 | 52.96-53.20 | 3.42-4.99 | 2 |
| 32 | Slovakia, Trstín: Formere limestone quarry above the Jewish cemetery                                                                                                                   | 48.5366 N<br>17.4537 E | 232  | 4x |    | 52.93±0.07 | 52.88-52.99 | 4.33-4.34 | 2 |
| 33 | France, Chambord: border of the forest track near the cross road                                                                                                                       | 47.6252 N<br>1.5103 E  | 97   | 4x | 32 | 48.26±0.50 | 47.63-48.94 | 4.08-5.10 | 3 |
| 34 | France, Aiguefonde: road side 1.3 km NNW of the centre of the town                                                                                                                     | 43.5053N<br>2.31939 E  | 253  | 4x |    | 48.62±0.72 | 47.48-49.82 | 4.21-5.31 | 3 |
| 35 | Spain, Taul: between the Boi and Taul villages, tourist path                                                                                                                           | 42.5207 N<br>0.84161 E | 1408 | 5x | 40 | 59.73±0.27 | 59.54-59.91 | 4.45-4.76 | 2 |
| 36 | France, St Etienne du Valdonnez: 1.5 km SE of the village, margin of the road ditch                                                                                                    | 44.4425 N<br>3.55666 E | 903  | 5x | 40 | 59.72±0.15 | 59.61-59.82 | 3.99-4.00 | 2 |
| 37 | Germany, Riedlingen: 3 km WNW of the village, Österberg hill, broad-leaved dry grassland invaded by scrub                                                                              | 48.1575 N<br>9.44166 E | 604  | 5x |    | 60.56±0.96 | 59.88-61.25 | 3.89-4.71 | 2 |
| 38 | France, Couson-les-Carières: 1,5 km S of the village near the road number N151, broad-leaved dry grassland along the road                                                              | 47.5894 N<br>3.50861 E | 206  | 5x | 40 | 60.31±0.82 | 59.60-61.21 | 4.17-4.99 | 3 |
| 39 | Spain, Boi: S margin of the village, along the road                                                                                                                                    | 42.5251 N<br>0.83361 E | 1317 | 5x |    | 60.78±0.22 | 60.62-60.94 | 4.74-5.75 | 2 |

|    |                                                                                                                                                 |                         |      |    |    |            |             |           |   |
|----|-------------------------------------------------------------------------------------------------------------------------------------------------|-------------------------|------|----|----|------------|-------------|-----------|---|
| 40 | France, Montgenerve: alpine grassland along the side path                                                                                       | 44.9178 N<br>6.71763 E  | 1906 | 5x |    | 60.97±0.54 | 60.49-61.55 | 4.45-4.96 | 3 |
| 41 | France, Sant Pierre Sur Orthe: 300 m of the village, field margin along the road number D304                                                    | 48.2052 N<br>0.19361 E  | 162  | 5x |    | 61.37±0.16 | 61.22-61.53 | 4.06-4.92 | 3 |
| 42 | Belgium, Hamoir: 1 km NE of the village, rock-outcrop above the Ourthe river                                                                    | 50.4438 N<br>5.53305 E  | 146  | 5x | 40 | 61.72±0.39 | 61.33-62.10 | 4.31-5.81 | 3 |
| 43 | Great Britain, Ingleton: Yorkshire shire, 0.5 km SW of the village, alluvial forest along the Greta river                                       | 54.1486 N<br>-02.4822 E | 102  | 5x |    | 61.90±0.35 | 61.52-62.46 | 3.45-4.95 | 6 |
| 44 | Germany, Sigmaringen: 4 km W of the village, the valley of Danube river, road margin                                                            | 48.0766 N<br>9.15972 E  | 592  | 5x |    | 62.29±0.17 | 62.07-62.33 | 3.97-4.70 | 4 |
| 45 | Switzerland, Cazis: 1 km of the village along the road number 13, broad-leaved dry grassland above the railway                                  | 46.7800 N<br>9.40916 E  | 653  | 5x |    | 62.41±0.74 | 61.32-63.13 | 3.90-4.95 | 5 |
| 46 | Italy, Nago: 1 km W of the village, broad-leaved forest and scrub                                                                               | 45.8666 N<br>10.8833 E  | 218  | 5x |    | 62.20±0.63 | 62.47-63.58 | 3.24-4.81 | 3 |
| 47 | Romania, Doman: between the Carasova and Domna villages, broad-leaved dry grassland along the road to Anin                                      | 45.2484 N<br>21.9057 E  | 413  | 5x |    | 63.21±0.56 | 62.86-63.86 | 3.84-4.76 | 3 |
| 48 | Slovakia, Pezinok: abandoned orchards and vineyards above the village close to the hospital                                                     | 48.3136 N<br>17.2538 E  | 227  | 5x |    | 63.28±0.47 | 62.86-63.79 | 4.20-4.53 | 3 |
| 49 | Poland, Mosina: 2 km NE of the village along the road number 431, forest above the river cuttof, sandy substrate                                | 52.2555 N<br>16.8855 E  | 68   | 5x |    | 63.39±0.53 | 62.10-64.10 | 3.42-4.63 | 4 |
| 50 | Slovakia, Svätý Jur: abandoned orchard invaded by scrub above the village and secondary Robinia pseudacacia forest between the vineyard         | 48.2511 N<br>17.2047 E  | 204  | 5x |    | 63.70±0.30 | 63.51-64.05 | 4.04-4.76 | 3 |
| 51 | Germany, Jungingen: abandoned orchard invaded by mesic scrub                                                                                    | 48.3258 N<br>9.04916 E  | 602  | 5x |    | 63.69±0.61 | 62.80-64.23 | 3.57-4.75 | 5 |
| 52 | Germany, Vsterling: 2 km SW of the Harburg village, broad-leaved forest near the village margins above the Nature reservation Wacsender Felser. | 48.6622 N<br>12.6494 E  | 381  | 5x |    | 63.78±0.24 | 63.57-64.04 | 4.07-4.97 | 3 |
| 53 | Serbia, Sokolský hrad: Sokolský castle, Serbia-Bosnia border, along the road to the castle                                                      | 44.1570 N<br>19.4835 E  | 472  | 5x |    | 64.06±1.07 | 62.89-64.98 | 3.66-4.46 | 3 |

|    |                                                                                                                                             |                        |     |    |    |            |             |           |   |
|----|---------------------------------------------------------------------------------------------------------------------------------------------|------------------------|-----|----|----|------------|-------------|-----------|---|
| 54 | Austria, Dietmanns: 50 m SW of the village, sliding slope above the road with <i>Pinus sylvestris</i> invaded by <i>Robinia pseudacacia</i> | 48.5708 N<br>14.9763 E | 682 | 5x |    | 64.18±0.55 | 63.45-64.90 | 3.72-4.85 | 6 |
| 55 | Slovakia, Svätý Jur: secondary <i>Robinia pseudacacia</i> forest above the village                                                          | 48.2500 N<br>17.2000 E | 201 | 5x |    | 64.39±0.86 | 63.70-65.61 | 3.39-4.92 | 4 |
| 56 | Slovenia, Goronja Radgona: village margin above the road to Maribor, margin of the secondary <i>Robinia pseudacacia</i> forest              | 46.6808 N<br>15.9766 E | 220 | 5x |    | 64.40±0.50 | 63.84-64.80 | 3.66-4.65 | 3 |
| 57 | Czech Rep., Mukoděly: on the W village margin, mesic scrub along oak-hornbeam forest                                                        | 50.1472 N<br>13.4056 E | 334 | 5x |    | 64.28±1.22 | 63.12-65.56 | 4.06-4.93 | 3 |
| 58 | Poland, Stojewsko: 0.5 km S of the village, abandoned quarry along the road, dry grassland overgrown by <i>Prunus spinosa</i>               | 50.9020 N<br>20.1438 E | 263 | 5x |    | 64.89±0.25 | 64.71-65.07 | 3.68-4.94 | 2 |
| 59 | Poland, Stopnica: S margin of the village, <i>Prunus spinosa</i> scrub on the field margin                                                  | 50.435 N<br>20.9355 E  | 223 | 5x |    | 65.17±0.72 | 64.66-65.68 | 3.77-4.56 | 2 |
| 60 | Austria, Krumpendorf a. W. S.: in the village near the Wörther See lake, orchard with the mesic scrub above the road                        | 46.6283 N<br>14.2291 E | 464 | 5x |    | 65.17±0.27 | 64.93-65.46 | 3.29-4.68 | 3 |
| 61 | Hungary, Hernadszurdok: 1.5 km S of the village, balk between the orchards invaded by <i>Robinia pseudacacia</i>                            | 48.4666 N<br>21.2000 E | 147 | 5x | 40 | 65.23±0.22 | 64.98-65.38 | 3.72-4.95 | 3 |
| 62 | Austria, Ziersdorf: NE margin of the village, <i>Robinia pseudacacia</i> forest and road ditch                                              | 48.5322 N<br>15.9358 E | 223 | 5x |    | 65.13±0.81 | 65.16-65.75 | 3.76-4.85 | 5 |
| 63 | Czech Rep., Malhotky: Nature reservation Malhotky, scrub at the foot-hill, close to the road                                                | 49.1486 N<br>17.0572 E | 250 | 5x |    | 65.71±0.04 | 65.69-65.76 | 3.46-4.73 | 3 |
| 64 | Poland, Jeziorko: 2 km SE of the village, balk with broad-leaved forest                                                                     | 50.8833 N<br>21.0333 E | 275 | 5x |    | 65.93±0.08 | 65.87-65.99 | 3.19-4.88 | 2 |
| 65 | Hungary, Döbrököz: along the road to Kurd village, secondary <i>Robinia pseudacacia</i> forest                                              | 46.4461 N<br>18.2588 E | 109 | 5x |    | 65.71±0.15 | 65.52-65.92 | 2.78-4.93 | 7 |
| 66 | Hungary, Somló: Somló TVK reservation, margin of the field road between the vineyard (in the middle of the hill)                            | 47.1447 N<br>17.3669 E | 300 | 5x | 40 | 65.43±0.43 | 64.61-65.74 | 2.49-4.22 | 6 |
| 67 | Switzerland, Bad Ragaz: margin of the alluvial forest of the river Rhine                                                                    | 46.9888 N<br>9.52833 E | 526 | 5x |    | 63.23±0.38 | 62.81-63.55 | 2.99-4.67 | 3 |
| 68 | Croatia, Gradac: SW of the village, 100 m from the quarry, the margin of the ravine forest above the road                                   | 45.4566 N<br>18.0411 E | 157 | 5x |    | 65.07±0.20 | 64.77-65.32 | 3.17-4.75 | 7 |

|    |                                                                                                                                                         |                        |     |    |    |            |             |           |    |
|----|---------------------------------------------------------------------------------------------------------------------------------------------------------|------------------------|-----|----|----|------------|-------------|-----------|----|
| 69 | Croatia, Vukovar: in the city centre, scrub under the church above the road to Ilok village direction                                                   | 45.3500 N<br>18.9833 E | 101 | 5x |    | 62.56±0.52 | 61.55-63.13 | 2.59-4.80 | 7  |
| 70 | Germany, Meiningen: 1,5 km E of the north village margin, above the road B 280 close to the crossing to Utendorf, slope with broad-leaved dry grassland | 50.5900 N<br>10.4441 E | 332 | 5x |    | 61.61±0.84 | 60.60-62.74 | 3.42-4.87 | 5  |
| 71 | Italy, Egna/Neumarkt: near the village, grassland under the orchard                                                                                     | 46.2925 N<br>11.2463 E | 225 | 5x |    | 61.85±0.51 | 60.90-62.30 | 3.68-4.87 | 9  |
| 72 | Germany, Hilkerode: W margin of the village, margin of the road and Robinia pseudacacia forest                                                          | 51.5619 N<br>10.3000 E | 181 | 5x |    | 64.42±0.31 | 64.20-64.64 | 3.71-4.42 | 2  |
| 73 | Germany, Kiebingen: 1 km SW of the village, orchard with mesic grassland                                                                                | 48.4658 N<br>8.96055 E | 380 | 5x |    | 62.15±0.63 | 61.49-62.75 | 3.43-5.34 | 3  |
| 74 | France, Void-Vacon: 0.5 km S of the village along the road to Vaucouleurs, broad-leaved dry grassland near the field                                    | 48.6786 N<br>5.62166 E | 301 | 5x |    | 62.24±0.55 | 61.60-62.58 | 3.48-4.85 | 3  |
| 75 | Czech Rep., Nová Lhota: 0.3 km W of the church, former alley with mesic scrub, field margin                                                             | 50 N 16 E              | 340 | 5x | 40 | 64.11±0.41 | 63.83-64.40 | 3.63-4.73 | 2  |
| 76 | France, Bessoncourt: Crossroad NE of the village, road margin                                                                                           | 47.6489 N<br>6.94030 E | 348 | 5x |    | 61.91±1.37 | 60.94-62.88 | 4.08-4.99 | 2  |
| 77 | France, Seré: NW village margin, rock-outcrop and pastures                                                                                              | 42.8861 N<br>0.01505 E | 690 | 5x | 40 | 60.73±0.44 | 60.41-61.35 | 4.37-4.81 | 4  |
| 78 | France, Roquerlan: 600 m WNW of the village center, pastures along the road D54                                                                         | 43.4389 N<br>2.39761 E | 611 | 5x |    | 61.54±0.57 | 60.81-62.46 | 4.50-5.12 | 9  |
| 79 | Lithuania, Varėna reg. Navikai: Hill, eastern incline 10°, Festuco-Brometea, small population.                                                          | 54.1350 N<br>24.0222 E | 136 | 5x |    | 63.59±0.86 | 62.81-64.51 | 4.65-4.99 | 3  |
| 80 | Lithuania, Molėtai reg. Karališkės: Hill, southern incline 20°, on the edge of the forest, Festuco-Brometea, small population.                          | 55.3450 N<br>25.3858 E | 126 | 5x |    | 64.58±0.74 | 64.06-65.11 | 3.42-4.56 | 2  |
| 81 | Russia, Leningrad region: Dry grassland communities on limestone soils along road along villages Pikkolovo, Murilovo, Perekula and Karvala.             | 59.6932 N<br>30.1534 E | 130 | 5x |    | 63.15±0.71 | 62.57-64.86 | 4.51-5.36 | 10 |
| 82 | Slovakia, Látkovce: 600 m NE of the village, road side close to the forest                                                                              | 48.7133 N<br>18.3644 E | 326 | 5x |    | 64.71±0.89 | 63.51-65.89 | 4.70-5.54 | 6  |
| 83 | Slovakia, Brezinka: S of the village, scrub along the road.                                                                                             | 48.3302 N<br>19.1834 E | 564 | 5x | 40 | 64.42±0.41 | 64.11-64.89 | 3.60-4.65 | 3  |

|    |                                                                                                                             |                        |      |    |    |            |             |           |   |
|----|-----------------------------------------------------------------------------------------------------------------------------|------------------------|------|----|----|------------|-------------|-----------|---|
| 84 | Slovakia, Belina: Dry grassland communities on loessal soil, along the road.                                                | 48.2437 N<br>19.8577 E | 251  | 5x |    | 65.18±0.89 | 64.00-66.15 | 4.03-4.14 | 4 |
| 85 | Spain, Taul: between the Boi and Taul villages, tourist path                                                                | 42.5207 N<br>0.84161 E | 1408 | 6x |    | 69.11±0.02 | 69.10-69.13 | 4.34-4.98 | 2 |
| 86 | Slovakia, Plešivec: 300 m W of the village, road margin invaded by Robinia pseudacacia                                      | 48.5377 N<br>20.4069 E | 279  | 6x |    | 71.29±0.23 | 71.13-71.45 | 4.00-4.92 | 2 |
| 87 | Italy, Montebelluna: 300 m S of the road, the vineyard margin under the road                                                | 45.7833 N<br>12.0333 E | 144  | 6x |    | 71.32±0.33 | 71.09-71.56 | 4.31-4.68 | 2 |
| 88 | Czech Rep., Slatinice: 1 km W of the church in the village, secondary Robinia pseudacacia forest in the valley of the brook | 49.5606 N<br>17.0886 E | 270  | 6x |    | 71.44±1.09 | 70.22-72.32 | 3.89-4.82 | 3 |
| 89 | Czech Rep., Darkovičky: 1.5 km S of the village, open sand grassland near the bunker                                        | 49.9333 N<br>18.1989 E | 250  | 6x |    | 71.53±0.66 | 70.77-72.01 | 3.00-4.93 | 3 |
| 90 | Germany, Oberschneiding: 1 km W of the village, under the road to Straubin, alluvial forest along the brook                 | 48.7972 N<br>12.6225 E | 351  | 6x | 48 | 71.86±0.62 | 71.30-72.73 | 3.77-4.96 | 4 |
| 91 | Germany, Cham: 2 km S of the village, field margin and small forest along the road number 20                                | 49.1972 N<br>12.6569 E | 407  | 6x |    | 71.94±0.61 | 71.01-72.79 | 3.58-4.60 | 8 |
| 92 | Germany, Haag an der Amper: E of the village, ravine forest above the road                                                  | 48.4597 N<br>11.8402 E | 450  | 6x |    | 73.01±0.61 | 71.86-73.01 | 4.25-4.84 | 3 |
| 93 | Czech Rep., Hlubočky: supporting stone wall of the slope above the road, N margin of the village                            | 49.6344 N<br>17.4092 E | 343  | 6x |    | 72.31±0.44 | 72.00-72.62 | 4.07-4.91 | 2 |
| 94 | Austria, Krenglbach: 2 km N of the village above the road number 141, broad-leaved dry grassland invaded by Ligustrum       | 48.2213 N<br>13.9544 E | 308  | 6x |    | 72.38±0.89 | 71.19-73.26 | 3.31-4.87 | 5 |
| 95 | Germany, Altzirkendorf: margin of the village, mesic scrub along the road to Pegnitz direction                              | 49.7363 N<br>11.6650 E | 541  | 6x |    | 72.58±0.45 | 72.07-72.85 | 3.17-4.70 | 3 |
| 96 | France, Cour-et Buis: 5 km W of the village, rocky margin of the pasture                                                    | 45.4344 N<br>4.94694 E | 285  | 6x |    | 72.50±0.57 | 71.92-73.06 | 3.27-4.89 | 3 |
| 97 | Czech Rep., Vrčeň: on the SE village margin, the stony balk above the road                                                  | 49.5100 N<br>13.6256 E | 450  | 6x |    | 72.57±0.68 | 71.87-73.23 | 3.87-4.92 | 3 |
| 98 | Germany, Schöenberg: town centre, rocks outcrops above the road to Worms village                                            | 49.6916 N<br>8.64666 E | 144  | 6x |    | 72.59±0.30 | 72.37-72.80 | 3.45-4.94 | 2 |

|     |                                                                                                                                                              |                        |     |    |    |             |             |           |    |
|-----|--------------------------------------------------------------------------------------------------------------------------------------------------------------|------------------------|-----|----|----|-------------|-------------|-----------|----|
| 99  | Germany, Riedlingen: 3 km WNW of the village, Österberg hill, broad-leaved dry grassland invaded by scrub                                                    | 48.1575 N<br>9.44166 E | 604 | 6x |    | 72.63±0.69  | 72.22-73.66 | 3.86-4.95 | 4  |
| 100 | Italy, Colle: 300 m of the village to Maniago direction, forest margin between the road and forest                                                           | 46.1616 N<br>12.8194 E | 219 | 6x |    | 72.65±0.87  | 71.71-73.64 | 3.55-4.87 | 5  |
| 101 | Austria, Freistadt: 3.5 km W of the town above the road number 38 (108 kilometre of the road), sliding slopes and rock outcrops with <i>Pinus sylvestris</i> | 48.5113 N<br>14.4550 E | 629 | 6x | 48 | 72.72±0.65  | 72.14-73.56 | 3.78-4.78 | 4  |
| 102 | France, Belfort: N margin of the village, edge of the forest above the road                                                                                  | 47.6438 N<br>6.8950 E  | 392 | 6x | 48 | 72.96±0.60  | 72.56-73.65 | 4.25-4.93 | 3  |
| 103 | Nederland, Wageningen: S margin of the village, dry grassland of the Wageningse Berg hill                                                                    | 51.9666 N<br>5.68333 E | 36  | 6x |    | 72.98±0.36  | 72.57-73.21 | 4.18-4.90 | 3  |
| 104 | Germany, Oberoderwitz: Hutberg hill under the village, oak-hornbeam forest on the hilltop                                                                    | 50.9608 N<br>14.6897 E | 484 | 6x |    | 73.20±0.22  | 73.05-73.35 | 3.69-4.45 | 2  |
| 105 | France, Aiguefonde: 1.3 km NNE of the village center, road and field margin                                                                                  | 43.5053 N<br>2.31938 E | 253 | 6x |    | 70.56±0.69  | 69.49-71.83 | 4.68-6.50 | 9  |
| 106 | France, l'Isle-s le Doubs: 3 km E of the village, dry grassland communities along the road D663                                                              | 47.4514 N<br>6.62347 E | 326 | 6x | 48 | 71.85±0.57  | 70.89-72.83 | 4.75-6.23 | 12 |
| 107 | Slovakia, Čakanovce: SW margin of the village, scrop along the field road close to the sandy outcrop.                                                        | 48.2116 N<br>19.8055 E | 280 | 6x |    | 72.14±0.65  | 71.68-72.60 | 3.80-4.60 | 2  |
| 108 | Slovakia, Nová Baňa: 900 m W of the brige across Hron river, above the road from Orovnice village                                                            | 48.4091 N<br>18.6359 E | 244 | 6x |    | 71.16±0.64  | 70.25-72.32 | 4.07-5.85 | 7  |
| 109 | France, Chateau-Arnuoux: 3 km ESE of the village, near the road number N85, the road ditch                                                                   | 44.0675 N<br>6.02138 E | 436 | 7x |    | 87.17±2.19  | 84.87-89.22 | 3.30-4.89 | 3  |
| 110 | France, Cérilly: E of the village along the road number 965, broad-leaved dry grassland                                                                      | 47.8638 N<br>4.51861 E | 238 | 7x | 56 | 83.75±1.28  | 82.98-85.23 | 3.15-4.16 | 3  |
| 111 | France, l'Isle-s le Doubs: margin of the forest road                                                                                                         | 47.4502 N<br>6.62194 E | 329 | 7x | 56 | 83.795±1.34 | 82.85-84.75 | 2.00-3.15 | 2  |
| 112 | France, Troyes: 1 km E of the village, road ditch along the road number 960                                                                                  | 48.3338 N<br>4.14638 E | 127 | 7x |    | 86.17±0.12  | 86.10-86.26 | 3.45-4.99 | 2  |



|     |                                                                                                                                            |                        |      |    |    |            |             |           |   |
|-----|--------------------------------------------------------------------------------------------------------------------------------------------|------------------------|------|----|----|------------|-------------|-----------|---|
| 113 | France, Die: 2 km SSE of the village, the margin of the road number 93, grassy zone between the road and the field                         | 44.7402 N<br>5.38416 E | 404  | 7x | 56 | 86.14±0.48 | 85.80-86.48 | 3.80-4.99 | 2 |
| 114 | Spain, El Cardoso de la Sierra: Hermitage de San Roque, in the border of a Quercus pyrenaica forest with a dry meadow dominated by grasses | 41.0929 N<br>3.4631 E  | 1240 | 8x | 64 | 92.13±0.99 | 93.25-91.12 | 4.69-5.60 | 4 |

---

FIG. S1. Flow cytometric histograms documenting the variation in the genome size of *Allium oleraceum*. (a) Simultaneous analysis of pentaploid populations No. 71 from Italy ( $2C = 61.84$  pg) and No. 65 from Hungary ( $2C = 65.71$  pg). (b) Simultaneous analysis of tetraploid populations No. 11 from France ( $2C = 49.17$  pg;  $2n = 32$ ) and No. 25 from Poland ( $2C = 55.55$  pg;  $2n = 32$ ).

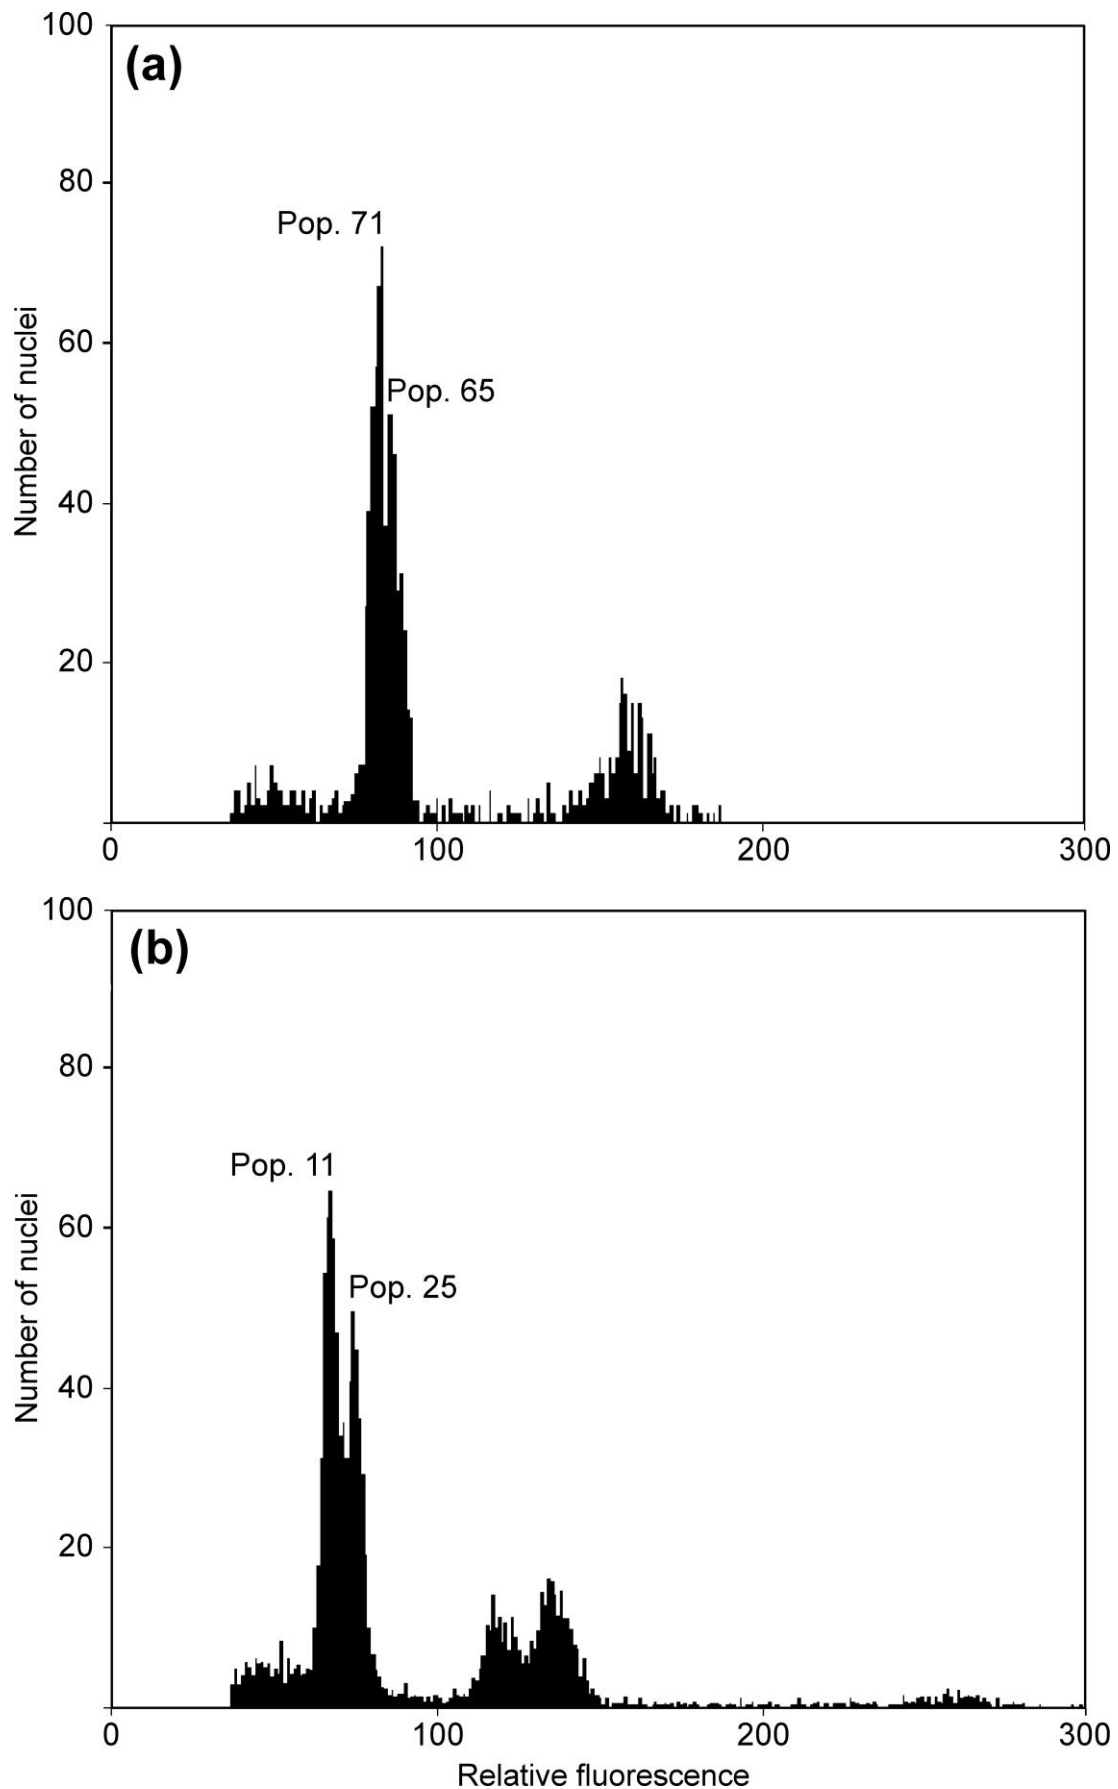

Supplement: supp_mcs297_mcs297supp.pdf [file supp_mcs297_mcs297supp.pdf]
